# Supplementary material for: Genome-Wide Analysis of Innate Susceptibility Mechanisms of Escherichia coli to Colistin
Source: MDPI journal article supplement (doi:10.3390/antibiotics11111668), 2022-11-21
Supplement: s1 [file s1]

# SUPPLEMENTARY MATERIAL

## Genome-Wide Analysis of Innate Susceptibility Mechanisms of *Escherichia coli* to Colistin

Muhammad Yasir <sup>1,\*†</sup>, A. Keith Turner <sup>1,†</sup>, Sarah Bastkowski <sup>1</sup>, Martin Lott <sup>1</sup>, Emma R. Holden <sup>1</sup>, Andrea Telatin <sup>1</sup>, Andrew J. Page <sup>1</sup>, Mark A. Webber <sup>1,2</sup> and Ian G. Charles <sup>1,2</sup>

<sup>1</sup> Quadram Institute Bioscience, Rosalind Franklin Road, Norwich NR4 7UQ, UK

<sup>2</sup> Norwich Medical School, Norwich Research Park, Colney Lane, Norwich NR4 7TJ, UK

\* Correspondence: muhammad.yasir@quadram.ac.uk; Tel.: +44-1603255391

† These authors contributed equally to this work.

**Table S1: Experimental treatments**

| Concentration              | 0 mM IPTG                          | 0.2 mM IPTG                          | 1 mM IPTG                          |
|----------------------------|------------------------------------|--------------------------------------|------------------------------------|
| 2 x MIC colistin           | 2 x MIC colistin with 0 mM IPTG    | 2 x MIC colistin with 0.2 mM IPTG    | 2 x MIC colistin with 1 mM IPTG    |
| 1 x MIC colistin           | 1 x MIC colistin with 0 mM IPTG    | 1 x MIC colistin with 0.2 mM IPTG    | 1 x MIC colistin with 1 mM IPTG    |
| 0.5 x MIC colistin         | 0.5 x MIC colistin with 0 mM IPTG  | 0.5 x MIC colistin with 0.2 mM IPTG  | 0.5 x MIC colistin with 1 mM IPTG  |
| 0.25 x MIC colistin        | 0.25 x MIC colistin with 0 mM IPTG | 0.25 x MIC colistin with 0.2 mM IPTG | 0.25 x MIC colistin with 1 mM IPTG |
| 0 x MIC colistin (control) | 0 x MIC colistin with 0 mM IPTG    | 0 x MIC colistin with 0.2 mM IPTG    | 0 x MIC colistin with 1 mM IPTG    |

MIC = minimal inhibitory concentration. IPTG = isopropyl  $\beta$ - d-1-thiogalactopyranoside.

There were two replicates of each treatment combination

**Table S2: Sequencing run statistics**

| Sample                                             | Total<br>reads | Reads<br>matched | % Matched | Reads<br>mapped | % Mapped | Total unique<br>insert sites | Average distance<br>(bp) between inserts |
|----------------------------------------------------|----------------|------------------|-----------|-----------------|----------|------------------------------|------------------------------------------|
| controlLBrep3-<br>1mM_S44_L999_R1_001.fastq        | 6031559        | 3033767          | 50        | 1910628         | 63       | 347558                       | 13                                       |
| controlLBrep3-<br>0.2mM_S57_L999_R1_001.fastq      | 8738674        | 3655412          | 42        | 1898899         | 52       | 184777                       | 25                                       |
| controlLBrep3_S49_L999_R1_001.fastq                | 8632256        | 3626215          | 42        | 1783687         | 49       | 195998                       | 24                                       |
| controlLBrep4-<br>1mM_S37_L999_R1_001.fastq        | 9564275        | 4296700          | 45        | 2413707         | 56       | 298137                       | 16                                       |
| controlLBrep4-<br>0.2mM_S39_L999_R1_001.fastq      | 8180854        | 3552001          | 43        | 1923180         | 54       | 230307                       | 20                                       |
| controlLBrep4_S40_L999_R1_001.fastq                | 9076061        | 3904669          | 43        | 1906172         | 49       | 197515                       | 23                                       |
| Colistinrep1-<br>25MIC1mM_S31_L999_R1_001.fastq    | 9211081        | 6208889          | 67        | 4497436         | 72       | 658559                       | 7                                        |
| Colistinrep1-25MIC-<br>0.2mM_S34_L999_R1_001.fastq | 9502606        | 6393804          | 67        | 4635996         | 73       | 674266                       | 7                                        |
| Colistinrep1-<br>25MIC_S35_L999_R1_001.fastq       | 9163212        | 6360876          | 69        | 4295149         | 68       | 669871                       | 7                                        |

|                                                   |          |         |    |         |    |        |     |
|---------------------------------------------------|----------|---------|----|---------|----|--------|-----|
| Colistinrep1-<br>2MIC1mM_S44_L999_R1_001.fastq    | 6216521  | 4029798 | 65 | 2883518 | 72 | 60061  | 77  |
| Colistinrep1-2MIC-<br>0.2mM_S45_L999_R1_001.fastq | 6146899  | 4131620 | 67 | 3108991 | 75 | 35224  | 131 |
| Colistinrep1-<br>2MIC_S38_L999_R1_001.fastq       | 7069947  | 4986969 | 71 | 3820292 | 77 | 34077  | 136 |
| Colistinrep1-<br>5MIC1mM_S51_L999_R1_001.fastq    | 10241441 | 7253316 | 71 | 5406212 | 75 | 677024 | 7   |
| Colistinrep1-5MIC-<br>0.2mM_S40_L999_R1_001.fastq | 10005681 | 7056284 | 71 | 5299664 | 75 | 701711 | 7   |
| Colistinrep1-<br>5MIC_S47_L999_R1_001.fastq       | 8692272  | 6257023 | 72 | 4353615 | 70 | 664703 | 7   |
| Colistinrep1-<br>MIC1mM_S52_L999_R1_001.fastq     | 7646978  | 5425713 | 71 | 4157783 | 77 | 659600 | 7   |
| Colistinrep1-MIC-<br>0.2mM_S49_L999_R1_001.fastq  | 8596805  | 5962307 | 69 | 4531253 | 76 | 681525 | 7   |
| Colistinrep1-<br>MIC_S50_L999_R1_001.fastq        | 8180011  | 5879998 | 72 | 4188011 | 71 | 628443 | 7   |

|                                                    |          |         |    |         |    |        |     |
|----------------------------------------------------|----------|---------|----|---------|----|--------|-----|
| Colistinrep2-<br>25MIC1mM_S39_L999_R1_001.fastq    | 9967776  | 6922029 | 69 | 5402897 | 78 | 669271 | 7   |
| Colistinrep2-25MIC-<br>0.2mM_S40_L999_R1_001.fastq | 10191470 | 7022432 | 69 | 5493519 | 78 | 736784 | 6   |
| Colistinrep2-<br>25MIC_S37_L999_R1_001.fastq       | 9996200  | 7048236 | 71 | 5076933 | 72 | 697001 | 7   |
| Colistinrep2-<br>2MIC1mM_S42_L999_R1_001.fastq     | 7461190  | 5228786 | 70 | 4021881 | 77 | 117474 | 39  |
| Colistinrep2-2MIC-<br>0.2mM_S49_L999_R1_001.fastq  | 6331193  | 4404349 | 70 | 3378050 | 77 | 52842  | 88  |
| Colistinrep2-<br>2MIC_S50_L999_R1_001.fastq        | 7568278  | 5420026 | 72 | 4547368 | 84 | 42988  | 108 |
| Colistinrep2-<br>5MIC1mM_S31_L999_R1_001.fastq     | 10658169 | 7327714 | 69 | 5685610 | 78 | 707201 | 7   |
| Colistinrep2-5MIC-<br>0.2mM_S30_L999_R1_001.fastq  | 13819391 | 9128953 | 66 | 6980634 | 76 | 735041 | 6   |
| Colistinrep2-<br>5MIC_S32_L999_R1_001.fastq        | 10319868 | 7079792 | 69 | 5064250 | 72 | 720294 | 6   |

|                                                  |         |         |    |         |    |        |   |
|--------------------------------------------------|---------|---------|----|---------|----|--------|---|
| Colistinrep2-<br>MIC1mM_S45_L999_R1_001.fastq    | 9273321 | 6605435 | 71 | 5186338 | 79 | 686625 | 7 |
| Colistinrep2-MIC-<br>0.2mM_S51_L999_R1_001.fastq | 9922337 | 7115673 | 72 | 5597110 | 79 | 709629 | 7 |
| Colistinrep2-<br>MIC_S43_L999_R1_001.fastq       | 7704930 | 5555566 | 72 | 3989807 | 72 | 674875 | 7 |

---

**Table S3: Correlation values of replicate 1 and replicate 2 of control and the colistin stress conditions**

| <b>Sample</b>    | <b>Correlation value (r)</b> |
|------------------|------------------------------|
| Control          | 0.994883728                  |
| Colistin 2MIC    | 0.98784257                   |
| Colistin 1MIC    | 0.99995168                   |
| Colistin 0.5MIC  | 0.999998307                  |
| Colistin 0.25MIC | 0.999805737                  |

**Table S4: Colistin and ciprofloxacin checkerboard setup**

|          | <b>1</b> | <b>2</b> | <b>3</b> | <b>4</b> | <b>5</b> | <b>6</b> | <b>7</b> | <b>8</b> | <b>9</b> | <b>10</b> | <b>11</b> | <b>12</b> |
|----------|----------|----------|----------|----------|----------|----------|----------|----------|----------|-----------|-----------|-----------|
| <b>A</b> | 4        | 4        | 4        | 4        | 4        | 4        | 4        | 4        | 4        | 4         | 4         | 4         |
|          |          | 0.25     | 0.125    | 0.06     | 0.03     | 0.015    | 0.008    | 0.004    | 0.002    | 0.001     | 0.0005    | 0.00025   |
| <b>B</b> | 2        | 2        | 2        | 2        | 2        | 2        | 2        | 2        | 2        | 2         | 2         | 2         |
|          |          | 0.25     | 0.125    | 0.06     | 0.03     | 0.015    | 0.008    | 0.004    | 0.002    | 0.001     | 0.0005    | 0.00025   |
| <b>C</b> | 1        | 1        | 1        | 1        | 1        | 1        | 1        | 1        | 1        | 1         | 1         | 1         |
|          |          | 0.25     | 0.125    | 0.06     | 0.03     | 0.015    | 0.008    | 0.004    | 0.002    | 0.001     | 0.0005    | 0.00025   |
| <b>D</b> | 0.5      | 0.5      | 0.5      | 0.5      | 0.5      | 0.5      | 0.5      | 0.5      | 0.5      | 0.5       | 0.5       | 0.5       |
|          |          | 0.25     | 0.125    | 0.06     | 0.03     | 0.015    | 0.008    | 0.004    | 0.002    | 0.001     | 0.0005    | 0.00025   |
| <b>E</b> | 0.25     | 0.25     | 0.25     | 0.25     | 0.25     | 0.25     | 0.25     | 0.25     | 0.25     | 0.25      | 0.25      | 0.25      |
|          |          | 0.25     | 0.125    | 0.06     | 0.03     | 0.015    | 0.008    | 0.004    | 0.002    | 0.001     | 0.0005    | 0.00025   |
| <b>F</b> | 0.125    | 0.125    | 0.125    | 0.125    | 0.125    | 0.125    | 0.125    | 0.125    | 0.125    | 0.125     | 0.125     | 0.125     |
|          |          | 0.25     | 0.125    | 0.06     | 0.03     | 0.015    | 0.008    | 0.004    | 0.002    | 0.001     | 0.0005    | 0.00025   |
| <b>G</b> | 0.062    | 0.062    | 0.062    | 0.062    | 0.062    | 0.062    | 0.062    | 0.062    | 0.062    | 0.062     | 0.062     | 0.062     |
|          |          | 0.25     | 0.125    | 0.06     | 0.03     | 0.015    | 0.008    | 0.004    | 0.002    | 0.001     | 0.0005    | 0.00025   |
| <b>H</b> |          |          |          |          |          |          |          |          |          |           |           |           |
|          |          | 0.25     | 0.125    | 0.06     | 0.03     | 0.015    | 0.008    | 0.004    | 0.002    | 0.001     | 0.0005    | 0.00025   |

Colistin concentrations are highlighted in blue and ciprofloxacin concentrations are highlighted in yellow.



## Supplementary Figures

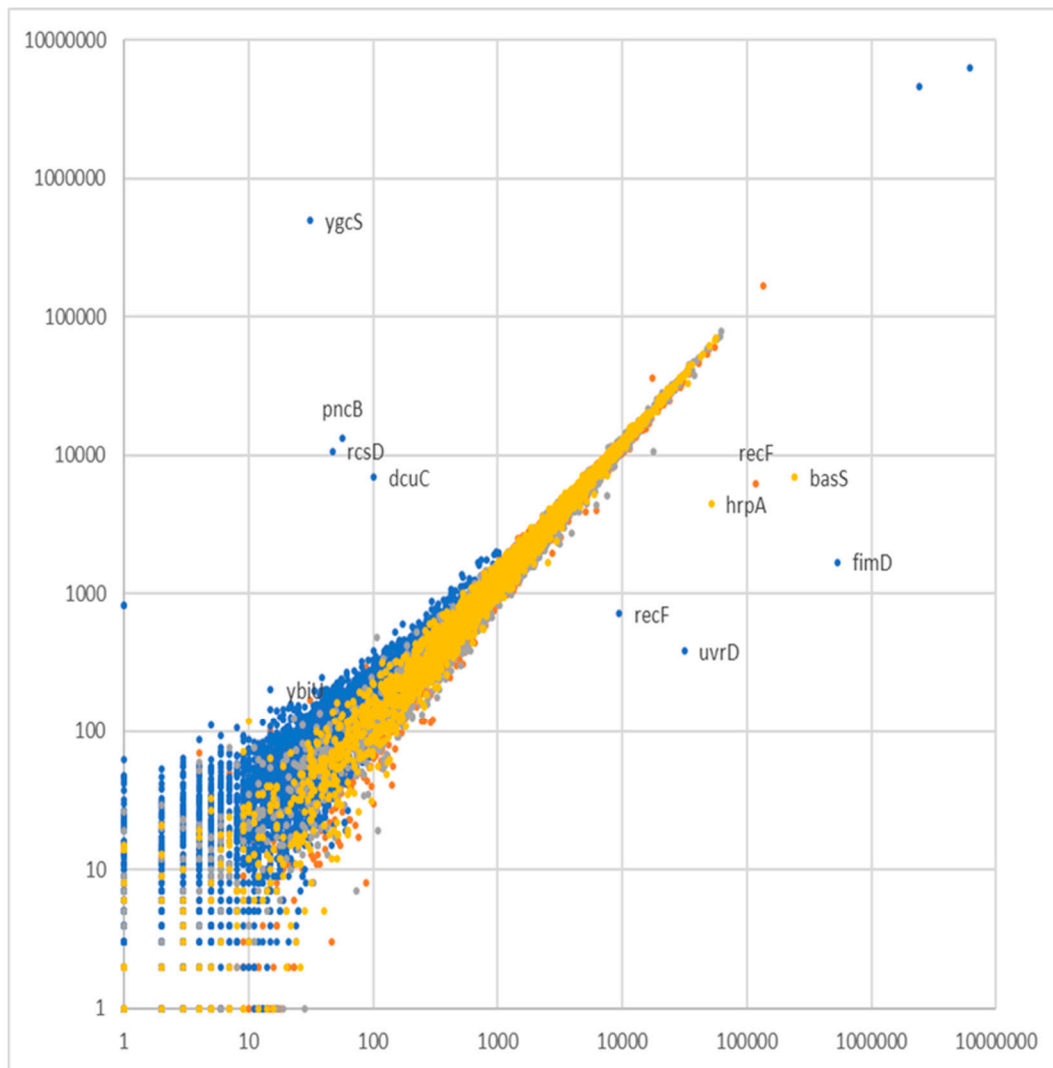

**Figure S1. Scatter chart showing the number of sequence-reads per gene.**

Each point on the chart represents a gene. For each gene, the number of sequence-reads obtained in control replicate 1 is plotted against the number in control replicate 2 and shown in black; the number of sequence-reads obtained in colistin replicate 1 are plotted against the number in colistin replicate 2 under growth conditions of 0.25 x MIC, 0.5 x MIC, 1 x MIC and 2 x MIC which are shown in grey, orange, yellow and blue, respectively. This shows the degree of experimental variation between biological replicates. MIC = minimum inhibitory concentration.

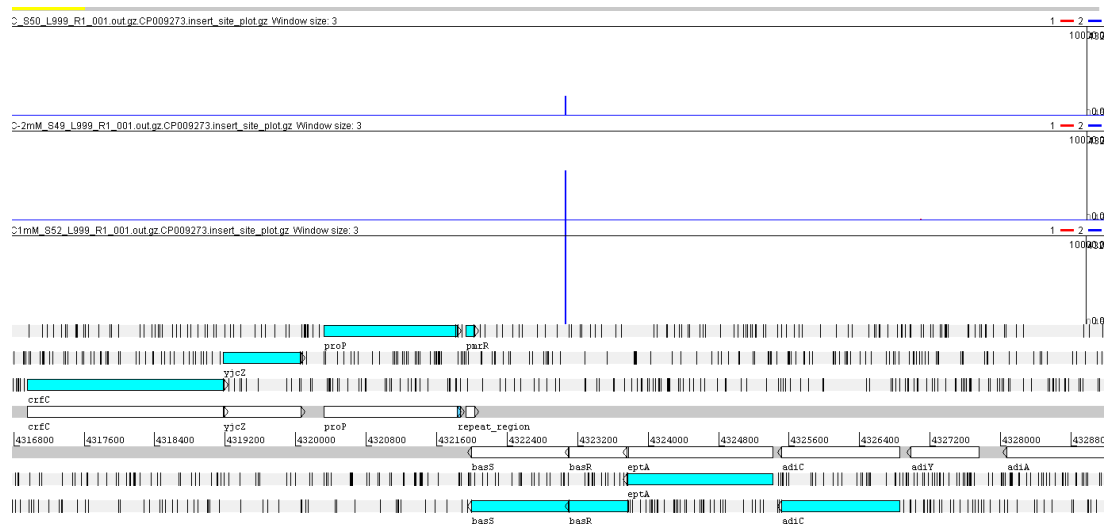

**Figure S2. Example of differential expression controlled by IPTG concentration**

Differential selection of insert sites within *basS* depending on promoter induction concentration. Above the genome representation, vertical blue lines indicate the positions of mapped reads; the height of the bar represents the relative number of reads mapped. The scale is set to minimum of 10,000 reads to highlight IPTG dependent induction. The top row shows uninduced culture, middle row shows 0.2mM induction of IPTG and the bottom row shows 1mM induction. All samples shown were exposed to 1X the MIC concentration of colistin.

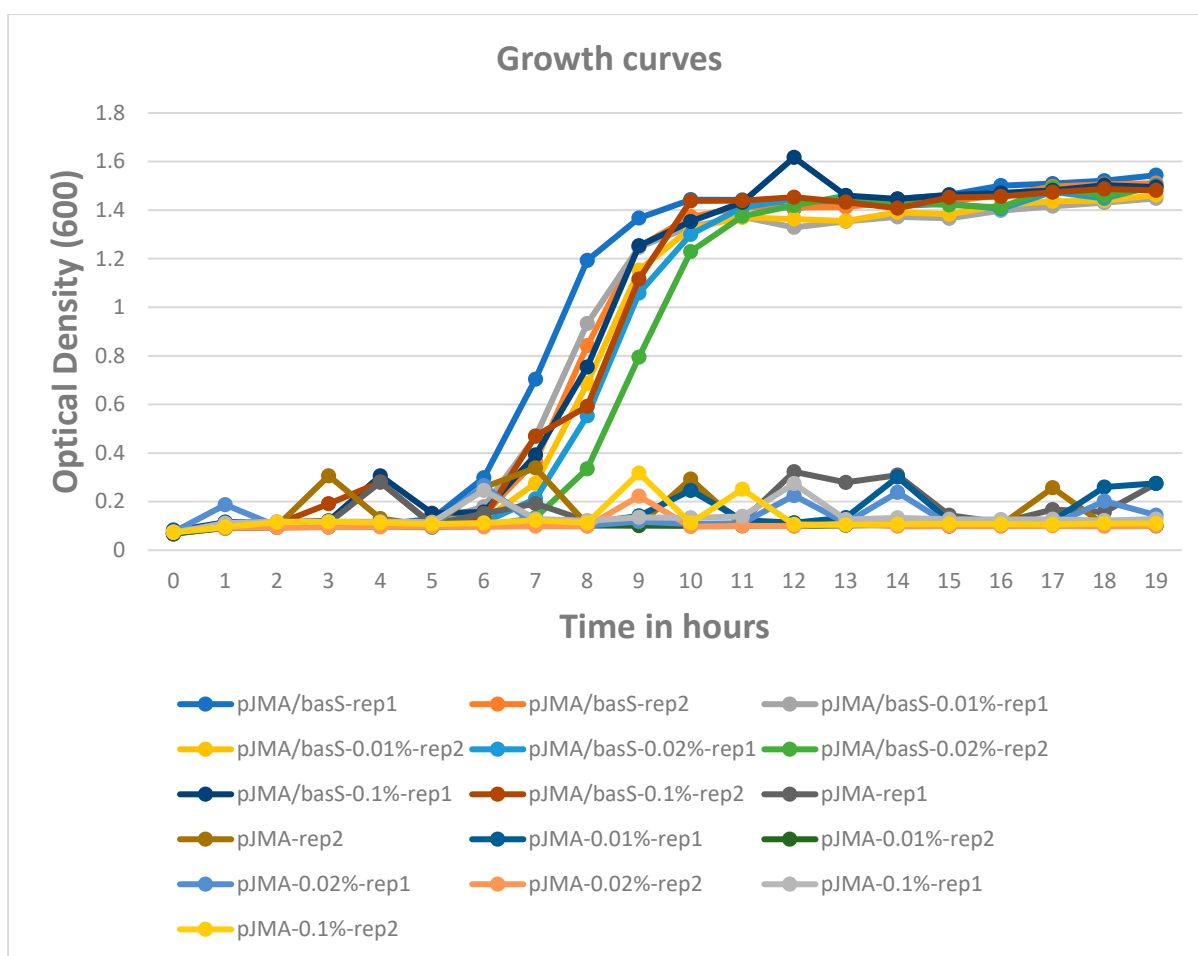

**Figure S3. Growth curves of *E. coli* BW25113 containing pJMA/basS or pJMA empty vector under colistin stress**

*E. coli* BW25113 containing either pJMA/basS or pJMA empty vector was grown in colistin stress with different induction concentrations 0.01%, 0.02% and 0.1% of rhamnose and incubated at 37°C for overnight. *E. coli* BW25113 containing pJMA/basS has shown growth curves at all induction levels including no induction while *E. coli* BW25113 containing pJMA empty vector have not been able to grow.

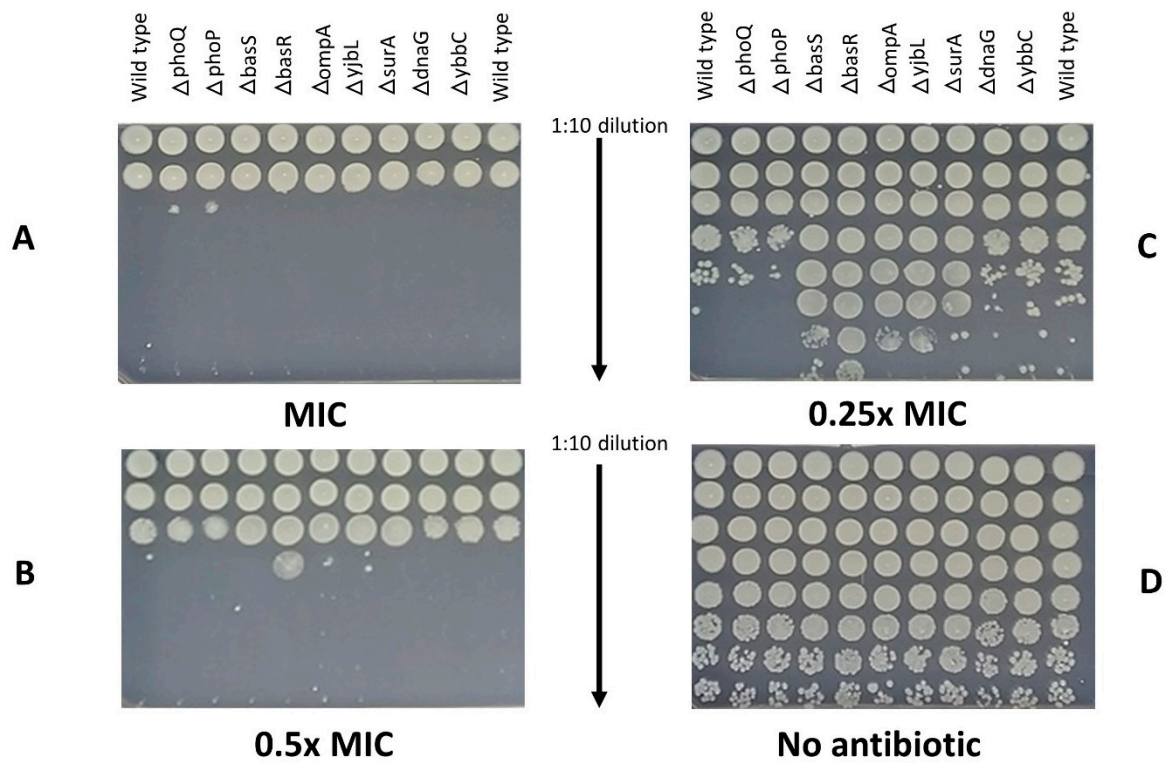

**Figure S4. Assessment of colistin susceptibility of defined mutants in isolation**

Mutants and the wild type overnight cultures were serially diluted (from top row down) onto an LB agar plates containing (A) the minimal inhibitory concentration (MIC), (B) half of the MIC (0.5x MIC) and (C) a quarter of the MIC (0.25x MIC) of colistin and (D) no colistin and incubated overnight at 37 °C.

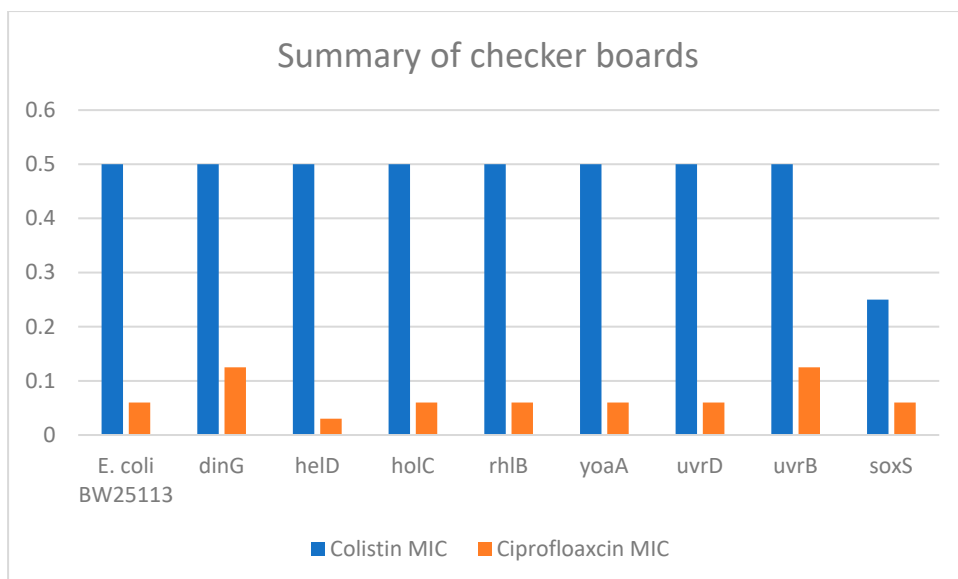

**Figure S5. Summary of checkerboards of colistin and ciprofloxacin of *E. coli* BW25113 and Keio mutants**

The checkerboard was setup using concentration of colistin and ciprofloxacin as explained in Table S4. *E. coli* BW25113 and different Keio mutants (*dinG*, *held*, *holC*, *rhIB*, *uvrD*, *uvrB* and *soxS*) were inoculated in individual checkerboard plates and results were interpreted by growth or no growth using visual observation. MICs of colistin and ciprofloxacin is plotted as blue and orange bars respectively.
